# Supplementary material for: Chemical Composition of Essential Oil from Citrus reticulata Blanco cv. Chachiensis (Chachi) and Its Anti-Mosquito Activity against Pyrethroid-Resistant Aedes albopictus
Source: MDPI journal article supplement (doi:10.3390/insects15050345), 2024-05-11
Supplement: s1 [file s1]

**Chemical Composition of Essential Oil from *Citrus reticulata* Blanco cv. Chachiensis (Chachi) and its Anti-mosquito Activity against Pyrethroid-resistant *Aedes albopictus***

Jifan Cao <sup>1,2</sup>, Wende Zheng <sup>1,2</sup>, Baizhong Chen <sup>3</sup>, Zhenping Yan <sup>1,2</sup>, Xiaowen Tang <sup>1,2</sup>, Jiahao Li <sup>1,2</sup>, Zhen Zhang <sup>1,2</sup>, Song Ang <sup>1,2</sup>, Chen Li <sup>1,2</sup>, Rihui Wu <sup>1,2</sup>, Panpan Wu <sup>1,2,\*</sup> and Wen-Hua Chen <sup>1,2,\*</sup>

<sup>1</sup> School of Pharmacy and Food Engineering, Wuyi University, Jiangmen 529020, P. R. China

<sup>2</sup> International Healthcare Innovation Institute (Jiangmen), Jiangmen 529040, P. R. China

<sup>3</sup> Guangdong Xinbaotang Biotechnology Co. Ltd, Jiangmen 529100, P. R. China

Supporting Information

Table S1. ANOVA one way test of acetylcholinesterase (AChE) inhibition

|                | Sum of Squares | df | F     | <i>p</i> |
|----------------|----------------|----|-------|----------|
| Between Groups | 2100           | 5  | 188.1 | <0.0001  |
| Within Groups  | 26.79          | 12 |       |          |
| Total          | 2126           | 17 |       |          |

Table S2. ANOVA one way test of carboxylesterase (EST) inhibition

|                | Sum of Squares | df | F     | <i>p</i> |
|----------------|----------------|----|-------|----------|
| Between Groups | 2338           | 6  | 43.75 | <0.0001  |
| Within Groups  | 124.7          | 14 |       |          |
| Total          | 2463           | 20 |       |          |

Table S3. ANOVA one way test of glutathione-S-transferase (GST) inhibition

|                | Sum of Squares | df | F     | <i>p</i> |
|----------------|----------------|----|-------|----------|
| Between Groups | 2447           | 6  | 41.55 | <0.0001  |
| Within Groups  | 137.4          | 14 |       |          |
| Total          | 2584           | 20 |       |          |

Table S4. ANOVA one way test of multifunctional oxidase (MFO) inhibition

|                | Sum of Squares | df | F     | <i>p</i> |
|----------------|----------------|----|-------|----------|
| Between Groups | 1959           | 6  | 258.8 | <0.0001  |
| Within Groups  | 17.66          | 14 |       |          |
| Total          | 1976           | 20 |       |          |

Table S5. Carboxylesterase (EST), glutathione-S-transferase (GST) and multifunctional oxidase (MFO) activities in larvae and adult mosquitoes

of susceptible and resistant strain of *Aedes albopictus*

| <i>A.albopictus</i> | Strain | EST<br>(nmol.min <sup>-1</sup> .mg <sup>-1</sup> ) | GST<br>(nmol.min <sup>-1</sup> .mg <sup>-1</sup> ) | MFO<br>(nmol.min <sup>-1</sup> .mg <sup>-1</sup> ) |
|---------------------|--------|----------------------------------------------------|----------------------------------------------------|----------------------------------------------------|
| Larvae              | Lab-S  | 12.21 ± 3.11                                       | 1.95 ± 1.43                                        | 0.02 ± 0.00                                        |
|                     | Pyr-R  | 11.10 ± 2.60                                       | 7.05 ± 1.14                                        | 1.72 ± 0.20                                        |
| Adult               | Lab-S  | 15.69 ± 3.27                                       | 8.66 ± 2.53                                        | 0.97 ± 0.09                                        |
|                     | Pyr-R  | 21.28 ± 5.40                                       | 11.50 ± 1.90                                       | 1.21 ± 0.12                                        |

Table S6. ANOVA one way test of Shannon

|                | Sum of Squares | df | F     | <i>p</i> |
|----------------|----------------|----|-------|----------|
| Between Groups | 83.11          | 5  | 23.84 | <0.0001  |
| Within Groups  | 8.368          | 12 |       |          |
| Total          | 91.48          | 17 |       |          |

Table S7. ANOVA one way test of Simpson

|                | Sum of Squares | df | F     | <i>p</i> |
|----------------|----------------|----|-------|----------|
| Between Groups | 0.3566         | 5  | 18.77 | <0.0001  |
| Within Groups  | 0.0456         | 12 |       |          |
| Total          | 0.4022         | 17 |       |          |

Table S8. ANOVA one way test of Chao 1

|                | Sum of Squares | df | F     | <i>p</i> |
|----------------|----------------|----|-------|----------|
| Between Groups | 2466811        | 5  | 197.0 | <0.0001  |
| Within Groups  | 30047          | 12 |       |          |
| Total          | 2496858        | 17 |       |          |

Table S9. ANOVA one way test of the relative abundance of *Wolbachia*

|                | Sum of Squares | df | F     | <i>p</i> |
|----------------|----------------|----|-------|----------|
| Between Groups | 4878           | 5  | 184.5 | <0.0001  |
| Within Groups  | 63.45          | 12 |       |          |
| Total          | 4942           | 17 |       |          |

Table S10. ANOVA one way test of the relative abundance of *Enterobacter*

|                | Sum of Squares | df | F     | <i>p</i> |
|----------------|----------------|----|-------|----------|
| Between Groups | 1942           | 5  | 36.75 | <0.0001  |
| Within Groups  | 126.8          | 12 |       |          |
| Total          | 2069           | 17 |       |          |

Table S11. ANOVA one way test of the relative abundance of *Elizabethkingia*

|                | Sum of Squares | df | F     | <i>p</i> |
|----------------|----------------|----|-------|----------|
| Between Groups | 558.3          | 5  | 25.56 | <0.0001  |
| Within Groups  | 52.42          | 12 |       |          |
| Total          | 610.7          | 17 |       |          |

Table S12. ANOVA one way test of the relative abundance of *Pseudomonas*

|                | Sum of Squares | df | F     | <i>p</i> |
|----------------|----------------|----|-------|----------|
| Between Groups | 193.8          | 5  | 224.5 | <0.0001  |
| Within Groups  | 2.072          | 12 |       |          |
| Total          | 195.9          | 17 |       |          |
